# Supplementary material for: One-step hexaplex immunoassays by on-line paper substrate-based electrospray ionization mass spectrometry for combined cancer biomarker screening
Source: Royal Society of Chemistry journal article supplement (doi:10.1039/d0sc06784a), 2021-01-01
Supplement: d0sc06784a1.pdf [file d0sc06784a1.pdf]

Supporting Information for

**One-step hexaplex immunoassays by on-line paper substrate based electrospray ionization mass spectrometry for combined cancer biomarker screening**

Shuting Xu,<sup>a,c</sup> Mingxia Liu,<sup>a</sup> Jie Feng,<sup>b</sup> Guangtao Yan,<sup>b</sup> Yu Bai <sup>\*a</sup> and Huwei Liu <sup>a</sup>

<sup>a</sup> Beijing National Laboratory for Molecular Sciences, Key Laboratory of Bioorganic Chemistry and Molecular Engineering of Ministry of Education, College of Chemistry and Molecular Engineering, Peking University, Beijing 100871, P. R. China. Tel: +86 10 6275 8198; E-mail: yu.bai@pku.edu.cn

<sup>b</sup> Medical Laboratory Center, Chinese People's Liberation Army General Hospital, Beijing 100853, P. R. China.

<sup>c</sup> Institute of Analytical Food Safety, School of Food Science and Technology, Jiangnan University, Wuxi 214122, P. R. China.

\* Phone: +86-10-62758198 (Y. B.).

\* E-mail: yu.bai@pku.edu.cn (Y. B.).

This supporting information included the synthesis of six rhodamine-based mass tags (RMTs), preparation and characterization of immune paper substrates and mass probes (MPs), details of the paper substrate-based electrospray ionization (PS-ESI) setup, details of immunoassay validation, and comparison of this method with other representative multiplexed immunoassays.

### Synthesis of Six Rhodamine-based Mass Tags (RMTs).

**Chemicals:** 11-Mercapto-1-undecanol (97%), 4-dimethylaminopyridine (DMAP, AR), and N,N'-dicyclohexylcarbodiimide (DCC, 99%) were purchased from Aladdin Co., Ltd. (Shanghai, China). 3-(Piperidin-1-yl)phenol (97%) was purchased from Ark Pharm, Inc. (Chicago, US). 3-Diethylaminophenol (98%), 3-dimethylaminophenol (97%), rhodamine 6G (AR), rhodamine 110 (AR), rhodamine 101 inner salt (92%), 4-carboxybenzaldehyde (97%), and chloranil (99%) were purchased from J&K Scientific Ltd. (Beijing, China). 30% Hydrogen peroxide, p-toluenesulfonic acid monohydrate (AR), sodium acetate (AR), sodium hydroxide (AR), sodium sulfate anhydrous (AR), sodium iodide (99%), sodium thiosulfate pentahydrate (AR), thionyl chloride (AR), hydrochloric acid (36%-38%) and sodium sulfate anhydrous (AR) were purchased from Sinopharm Chemical Reagent Co., Ltd. (Shanghai, China). Propionic acid (AR), N,N'-dimethylformamide (DMF, AR), pyridine (AR), ethyl acetate (AR), *n*-hexane (AR), dichloromethane (AR), chloroform (AR), and methanol (AR) were purchased from Xilong Chemical Co. Ltd. (Shantou, Guangdong, China). Purified water was from Hangzhou Wahaha Group (Hangzhou, China).

The synthesis of six RMTs referred to our previous work, the synthetic routes were shown in Figure S1 and described as follow:

**11, 11'-disulfanediylbis(undecan-1-ol) (b):** The 11-mercapto-1-undecanol (**a**, 1 mmol, 204.4 mg) was dissolved in 5 mL of ethyl acetate followed by the addition of 30% hydrogen peroxide (1 mmol, 110  $\mu$ L) and the catalyst sodium iodide (0.01 mmol, 2.5 mg). The reaction occurred under stirring at room temperature. After about 30 min, a saturated solution of sodium thiosulfate was added under stirring to make the solution color from yellow to white. The organic phase was extracted with ethyl acetate, washed with brine and dried over sodium sulfate anhydrous. The solvent was removed by a rotary evaporator to yield a white solid product **b** (200 mg).

**Six carboxy-substituted rhodamine heads:** The 3-diethylaminophenol (**c1**) (or dimethylaminophenol, **c2**, or 3-(Piperidin-1-yl)phenol, **c3**, 5 mmol) with the 4-carboxybenzaldehyde (**d**, 2.5 mmol, 375 mg) and *p*-toluenesulfonic acid monohydrate (0.4 mmol, 76 mg) were added to 25 mL propionic acid, and the mixture was stirred at 65 °C for 16 h. After cooling to room temperature, the mixture was poured into sodium acetate aqueous (3 mol/L, 100 mL). The resulting suspension was extracted with chloroform, and the combined organic extracts were dried over sodium sulfate anhydrous. After the solvent was evaporated by a rotary evaporator, the solid product was dissolved in a mixture of 30 mL methanol and 20 mL chloroform, followed by the addition of chloranil (1.2 mmol, 295 mg). The mixture was stirred for 2 h at room temperature, and then concentrated by rotary evaporation. The residue was purified by the column chromatography using a mixture eluent of chloroform/methanol. After concentration, the product **e1**, **e2** and **e3** were

obtained as purple crystal as the rhodamine heads of RMT443, RMT 387, and RMT467, respectively.

**Synthesis of 11, 11'-disulfaneylbis(undecan-1-ol):**

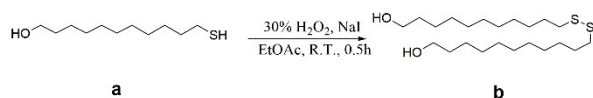

**Synthesis of Six carboxy-substituted rhodamine heads:**

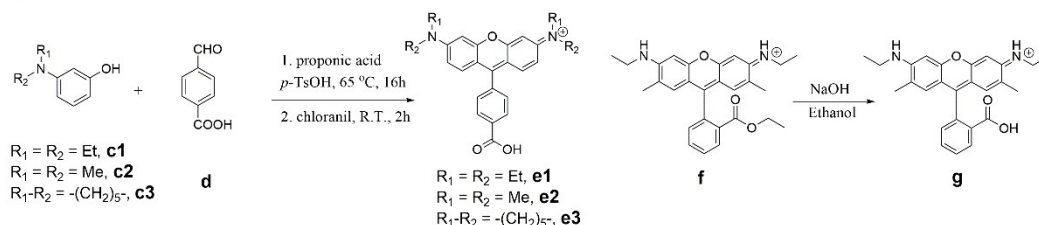

**Synthesis of Six RMTs:**

**Route 1**

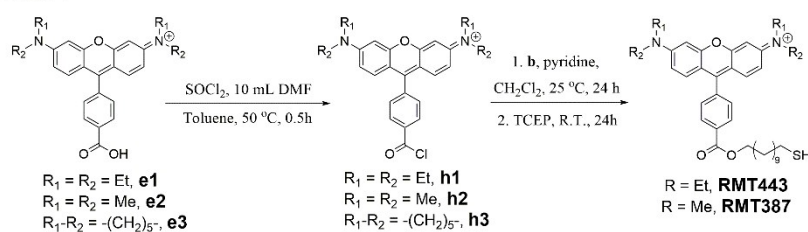

**Route 2**

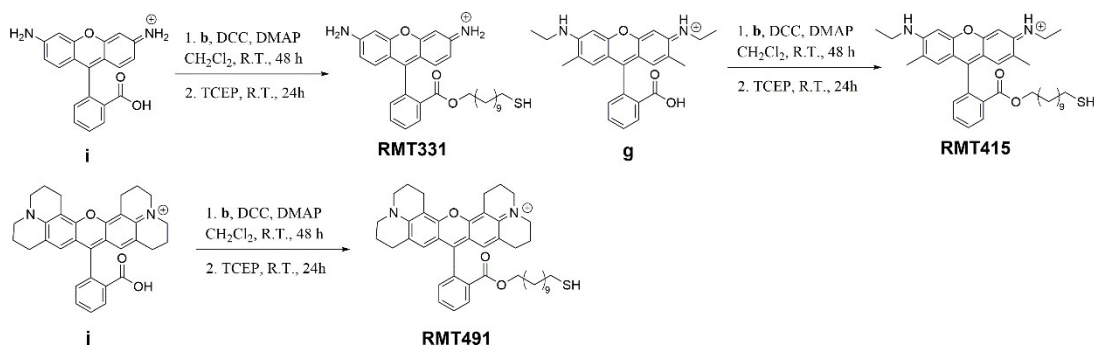

**Fig. S1** Synthetic routes of rhodamine-based mass tags (RMT331, RMT387, RMT415, RMT443, RMT467, and RMT491).

The rhodamine head of RMT415 was obtained from the hydrolysate of rhodamine 6G. The rhodamine 6G (**f**, 2.26 mmol, 1 g) was dissolved in 10 mL ethanol, and 0.1 g sodium hydroxide (2.5 mmol) was added. The reaction was performed at 70 °C for 12 h. The ethanol was removed by evaporation, and 50 mL of ion exchanged water was added. 1 mol/L hydrochloric acid was added dropwise to adjust the pH value to 2, and the solution was stirred for 1 h. Hydrolysate of rhodamine 6G (**g**, 960 mg) was obtained after filtering the deposited crystal. The rhodamine head of RMT331 and RMT491 were commercial reagents rhodamine 110 and rhodamine 101 inner salt.

**Target molecule RMTs:** The esterification of rhodamine heads had two synthetic routes: *Route 1:* **e1**, or **e2** or **e3** (0.226 mmol) was dissolved in 7 mL of toluene, and 1 mL thionyl chloride was added dropwise under continuous stirring in ice bath, followed by the addition of catalyst 10  $\mu$ L DMF. After the mixture was heated for 30 min at 60 °C, the solvent and thionyl chloride were removed by evaporation. The residue was washed by *n*-hexane for several times. The hexane was removed by evaporation to yield purple product **h1**, **h2**, and **h3** 4'-carbonyl chloride rhodamine. Then, product **b** (0.08 mmol, 33 mg) was mixed with **h1** (or **h2**, **h3**) in 4 mL anhydrous dichloromethane, followed by the addition of 14  $\mu$ L pyridine (0.16 mmol). The mixture was stirred for 24 h at room temperature. After the evaporation of solvent, the residue was dissolved in 10 mL acetonitrile, and TCEP dissolved in 3 mL water were added. The mixture was stirred at room temperature for 24 h for the reduction of disulfide bonds. The residue was purified by the column chromatography using a mixture eluent of chloroform/methanol, and the target molecule **RMT443**, **RMT387** and **RMT467**. The final products were verified by high resolution mass spectrometry (HRMS): [RMT443]<sup>+</sup> calculated for C<sub>39</sub>H<sub>53</sub>N<sub>2</sub>O<sub>3</sub>S<sup>+</sup>, 629.3771, found, 629.3771, MS/MS, 443.2327; [RMT387]<sup>+</sup> calculated for C<sub>35</sub>H<sub>45</sub>N<sub>2</sub>O<sub>3</sub>S<sup>+</sup>, 573.3142, found, 573.3145, MS/MS, 387.1702; [RMT467]<sup>+</sup> calculated for C<sub>41</sub>H<sub>53</sub>N<sub>2</sub>O<sub>3</sub>S<sup>+</sup>, 653.3771, found, 653.3771, MS/MS, 467.2327.

*Route 2:* **i**, or **g**, or **j** (0.24 mmol), product **b** (0.12 mmol, 48 mg), and DMAP (0.04 mmol, 5 mg) was dissolved in 7 mL of anhydrous dichloromethane, followed by the addition of DCC (0.36 mmol, 74 mg) dissolved in 3 mL anhydrous dichloromethane under continuous stirring in ice bath. The mixture was stirred under nitrogen at room temperature for 48 h. Then, 10 mL acetonitrile and TCEP (0.36 mmol, 100 mg) dissolved in 3 mL water were added, and the mixture was stirred at room temperature for 24 h. The concentrated residue was purified by the column chromatography using eluent of chloroform/methanol. After concentration, the product target molecule **RMT331**, **RMT415**, and **RMT491** were obtained. The final products were verified by high resolution mass spectrometry (HRMS): [RMT415]<sup>+</sup> calculated for C<sub>37</sub>H<sub>49</sub>N<sub>2</sub>O<sub>3</sub>S<sup>+</sup>, 601.3457, found, 601.3458, MS/MS, 415.2015; [RMT331]<sup>+</sup> calculated for C<sub>31</sub>H<sub>37</sub>N<sub>2</sub>O<sub>3</sub>S<sup>+</sup>, 517.2519, found, 517.2519, MS/MS, 331.1075; [RMT491]<sup>+</sup> calculated for C<sub>43</sub>H<sub>53</sub>N<sub>2</sub>O<sub>3</sub>S<sup>+</sup>, 677.3770, found, 677.3771, MS/MS, 491.2327.

## Six Target Proteins and Specific Antibodies.

**Table S1.** List of six target protein cancer biomarkers and their specific antibody pairs.

| Protein cancer biomarkers            |                                | Antibody pairs            |                                                     |                             |
|--------------------------------------|--------------------------------|---------------------------|-----------------------------------------------------|-----------------------------|
| Cancer antigen 15-3<br>(CA15-3)      | Fitzgerald,<br>Cat#30-1066     | <b>Capture antibody</b>   | Mouse monoclonal CA 15-3 antibody 1 (anti-CA15-3-1) | Fitzgerald,<br>Cat#10-1145  |
|                                      |                                | <b>Detection antibody</b> | Mouse monoclonal CA 15-3 antibody 2 (anti-CA15-3-2) | Fitzgerald,<br>Cat#10-1144  |
| Cancer antigen 19-9<br>(CA19-9)      | Fitzgerald,<br>Cat#30C-CP9063S | <b>Capture antibody</b>   | Monoclonal CA 19-9 antibody 1 (anti-CA19-9-1)       | Fitzgerald,<br>Cat#10-CA19B |
|                                      |                                | <b>Detection antibody</b> | Mouse monoclonal CA 19-9 antibody 2 (anti-CA19-9-2) | Fitzgerald,<br>Cat#10-CA19A |
| Carcinoma embryonic antigen<br>(CEA) | Fitzgerald,<br>Cat#30-AC30     | <b>Capture antibody</b>   | Mouse monoclonal CEA antibody 1 (anti-CEA-1)        | Fitzgerald,<br>Cat#10-C10DT |
|                                      |                                | <b>Detection antibody</b> | Mouse monoclonal CEA antibody 2 (anti-CEA-2)        | Fitzgerald,<br>Cat#10-C10ET |
| Cancer antigen 125<br>(CA125)        | Fitzgerald,<br>Cat#30C-CP1062  | <b>Capture antibody</b>   | Mouse monoclonal CA125 antibody 1 (anti-CA125-1)    | Novus,<br>Cat # NB120-10032 |
|                                      |                                | <b>Detection antibody</b> | Mouse monoclonal CA125 antibody 2 (anti-CA125-2)    | Novus,<br>Cat#NB600-1468    |
| Human epididymis protein 4 (HE4)     | Fitzgerald,<br>Cat#30-1338     | <b>Capture antibody</b>   | Mouse monoclonal HE4 antibody 1 (anti-HE4-1)        | Fitzgerald,<br>Cat#10-2460  |
|                                      |                                | <b>Detection antibody</b> | Mouse monoclonal HE4 antibody 2 (anti-HE4-2)        | Fitzgerald,<br>Cat#10-2459  |
| Alpha fetoprotein (AFP)              | Fitzgerald,<br>Cat#30-1029     | <b>Capture antibody</b>   | Mouse monoclonal AFP antibody 1 (anti-AFP-1)        | Fitzgerald,<br>Cat#10-2357  |
|                                      |                                | <b>Detection antibody</b> | Mouse monoclonal AFP antibody 2 (anti-AFP-2)        | Fitzgerald,<br>Cat#10-2457  |

### **Other Chemicals and Materials for Immune Preparation and Detection.**

Hydrogen tetrachloroaurate (III) hydrate was purchased from Beijing Chemical Works (Beijing, China). Potassium periodate ( $\text{KIO}_4$ , 99%), 2,4-dinitrophenylhydrazine (2,4-DNP, AR), sulfuric acid (AR), glycerol (AR), trisodium citrate dihydrate (AR) and potassium carbonate ( $\text{K}_2\text{CO}_3$ , AR) were purchased from Sinopharm Chemical Reagent Co., Ltd. (Shanghai, China). Tris(2-carboxyethyl)phosphine hydrochloride (TCEP, 98%), 4-(2-hydroxyethyl)-1-piperazineethanesulfonic acid (HEPES, AR), methanol (HPLC grade), 4, 7, 10, 13, 16, 19, 22, 25, 32, 35, 38, 41, 44, 47, 50, 53-hexadeca-28, 29 dithiahexapentacontanedioic acid di-N-succinimidyl ester (NHS-PEG-S-S-PEG-NHS), crystal violet (CV, AR), immunoglobulin G (IgG) from rat serum, and bovine serum albumin (BSA) were purchased from Sigma-Aldrich (Shanghai, China). Goat anti-rat IgG and horse radish peroxidase (HRP)-conjugated goat anti-rat IgG were purchased from Shengggong Bioengineering Ltd. Company (Shanghai, China). 3,3',5,5'-tetramethylbenzidine (TMB) substrate chromogenic kit was purchased from Yuanye Bio-Technology Co., Ltd (Shanghai, China). Buffers used in our study were as follows: phosphate buffered saline (PBS, 10 mM, pH 7.4, containing 138 mmol/L NaCl, 2.7 mmol/L KCl), tris-HCl buffer (25 mmol/L, pH 7.4, containing 100 mmol/L NaCl, 5 mmol/L  $\text{MgCl}_2$ ), and HEPES buffer (10 mmol/L, pH 7.5, containing 137 mmol/L NaCl). Purified water was produced by Hangzhou Wahaha Group (Hangzhou, China).

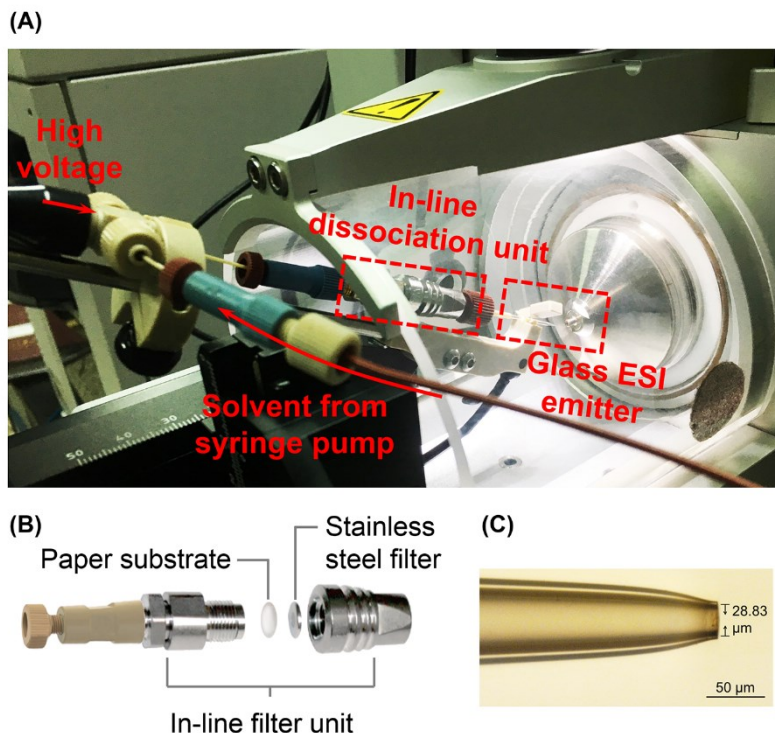

**Fig. S2** (A) Photo of the paper substrate-based electrospray ionization setup (PS-ESI), containing a refitted in-line filter unit, home-made glass ESI emitter, cross joint for applied voltage and solvent supplied by syringe pump. (B) Components of the refitted in-line filter unit. (C) Micrograph of the glass electrospray emitters with a tip of about 30  $\mu\text{m}$ .

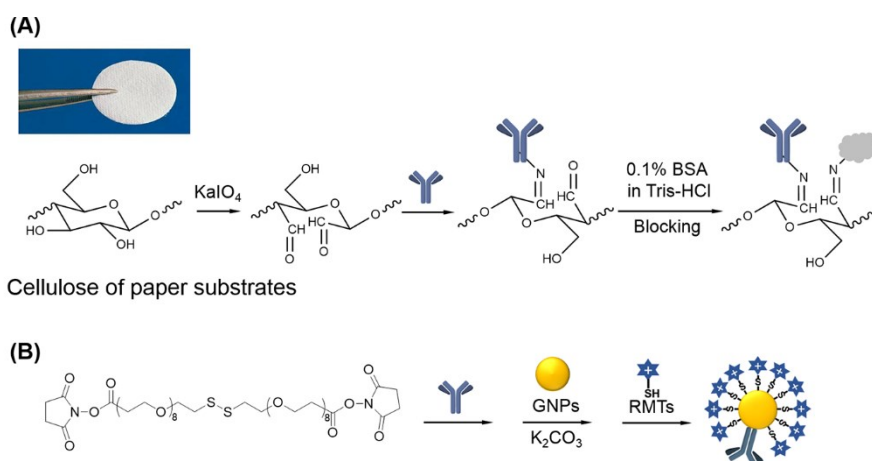

**Fig. S3** (A) Route of capture antibody modification on paper substrates: oxidation of cellulose of paper substrates, covalent linkage of capture antibodies on oxidized paper substrates, and blocking of residual aldehyde groups on paper substrates. (B) Preparation route of mass probes (MPs): detection antibody linkage with thiol end groups, modified antibodies self-assembling on gold nanoparticles (GNPs), and RMTs self-assembling on GNPs.

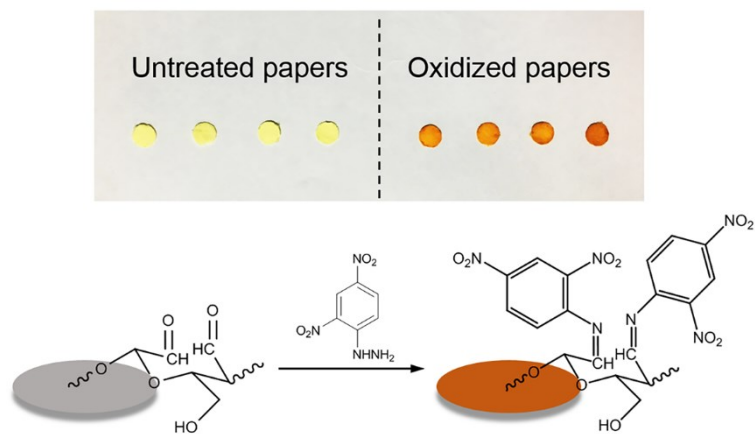

**Fig. S4** 2,4-dinitrophenylhydrazine (2,4-DNP) color reactions with aldehyde-functionalization paper substrates and untreated papers: the aldehyde-functionalization paper substrates presenting obvious orange and the untreated papers only remaining a slight yellow.

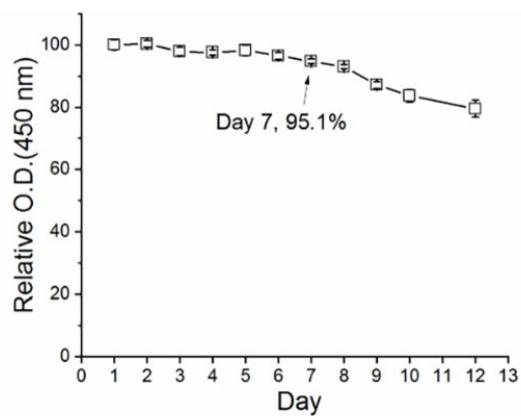

**Fig. S5** The protein activity of HRP-conjugated anti-IgG modified substrates kept in PBS for more than a week.



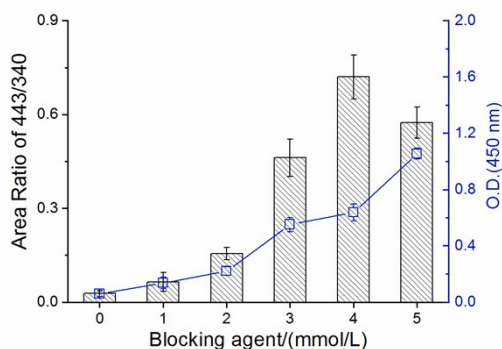

**Fig. S6** The optimization of blocking agent (11-mercaptoundecyl)hexa(ethyleneglycol) (MUDOL) on GNPs, using both O.D. 450 nm values and MS signals of RMT443 fragment ( $m/z = 443.2$ ) and IS ( $m/z = 340.2$ ) for evaluation, the minimal non-specific signals appearing only without the addition of MUDOL.

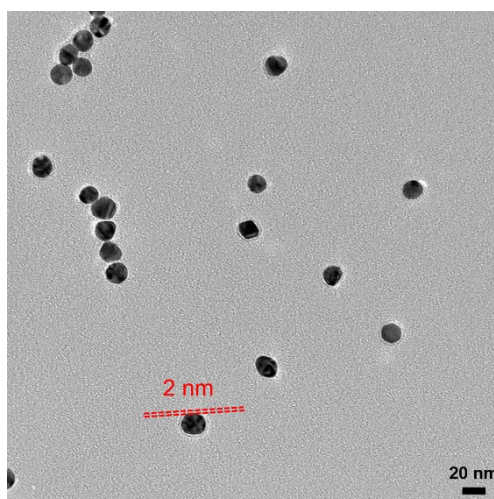

**Fig. S7** Transmission electron microscopy (TEM) image of antibodies and RMT443 modified GNP probes, suggesting the spherical and monodispersed particles with about 20 nm in diameter and a modified corona of 2 nm thickness.

**Table S2.** Identification of dissociated mass tag derivatives of RMT443 based on the parent ions and tandem MS ions.

|   | Formula                       | Parent ions $m/z$ | Tandem MS ions $m/z$ |
|---|-------------------------------|-------------------|----------------------|
| 1 | $C_{78}H_{104}N_4O_6S_2^{2+}$ | 628.5             | 443.3, 430.3, 398.3  |
| 2 | $C_{39}H_{53}N_2O_3S^+$       | 629.7             | 443.4                |
| 3 | $C_{78}H_{104}N_4O_6S^{2+}$   | 612.5             | 443.3                |
| 4 | $C_{78}H_{104}N_4O_7S^{2+}$   | 636.4             | 443.3, 398.3         |
| 5 | $C_{39}H_{53}N_2O_4S^+$       | 645.4             | 443.3, 399.2, 430.3  |
| 6 | $C_{78}H_{104}N_4O_7S^{2+}$   | 620.6             | 443.3, 430.3, 398.2  |

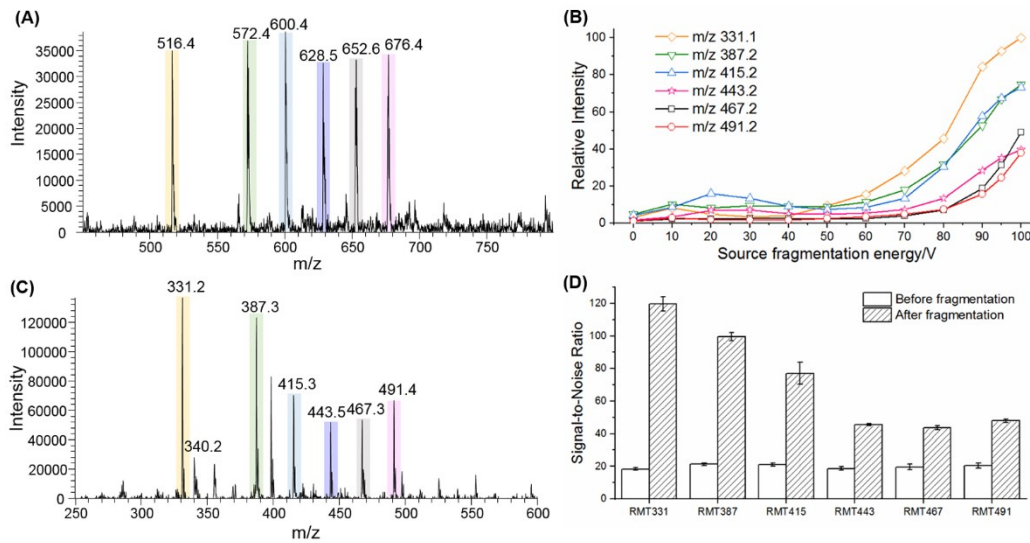

**Fig. S8** (A) The mass spectrum of the dissociated six GNP@RMTs before fragmentation ( $m/z = 516.4, 572.4, 600.4, 628.5, 652.6$  and  $676.4$ ). (B) The relative intensities of six RMTs and after fragmentation ( $m/z = 331.1, 387.2, 415.2, 443.2, 467.2$  and  $491.2$ ) under source fragmentation energy from 0 to 100 V. (C) The mass spectrum of the dissociated six RMTs after fragmentation. (D) The signal-to-noise ratios of representative signals of six RMTs before fragmentation ( $m/z = 516.4, 572.4, 600.4, 628.5, 652.6$  and  $676.4$ ) and after fragmentation ( $m/z = 331.2, 387.3, 415.3, 443.5, 467.3$  and  $491.4$ ).

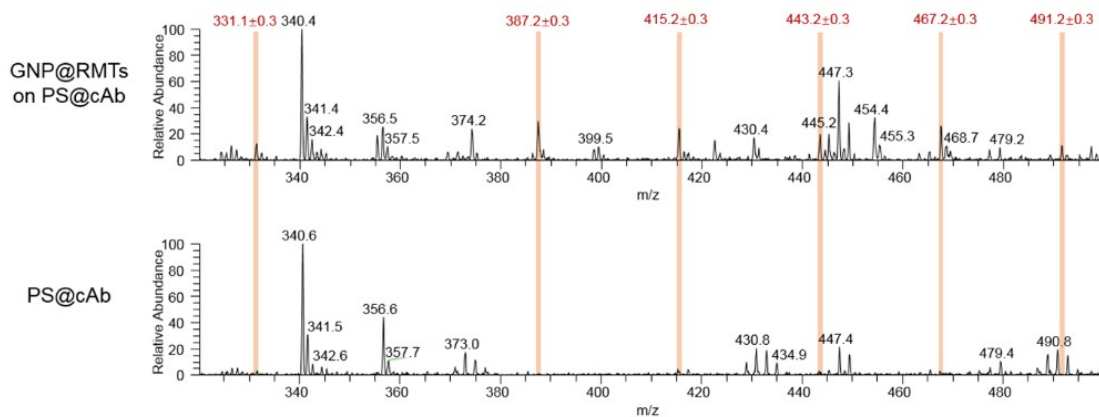

**Fig. S9** The mass spectra of the dissociated six GNP@RMTs from paper substrates modified with capture antibodies prepared as immune procedure and blank paper substrates modified with capture antibodies, showing negligible interference of complex immune condition for mass reporter tag readout using relative lower resolution mass spectrometer.

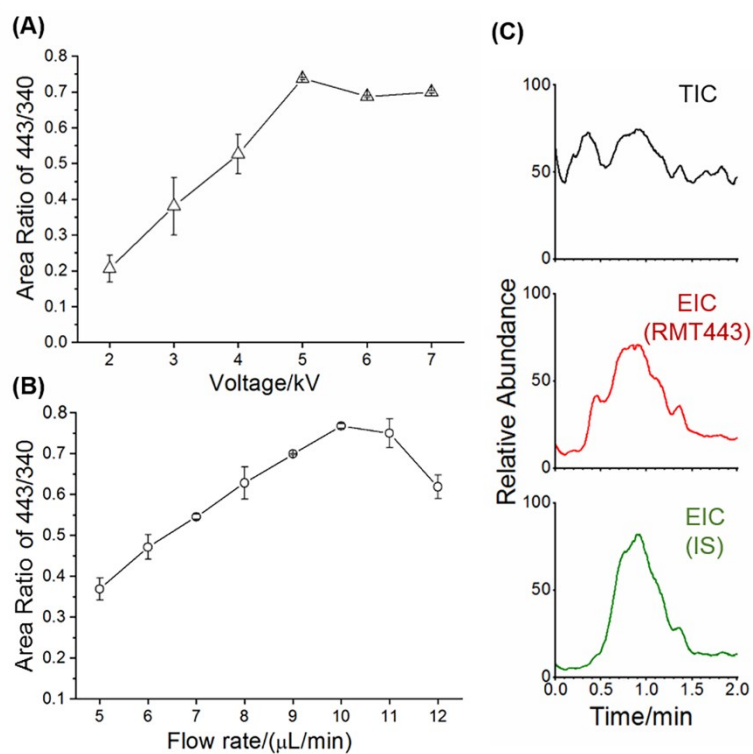

**Fig. S10** The optimization of spray voltage (A) and solvent flow rate (B) for the paper substrate-based electrospray ionization MS (PS-ESI MS) system, using the area ratios of the mass reporter of RMT443 ( $m/z = 443.2$ ) and the fragment of IS ( $m/z = 340.3$ ) for evaluation. (C) One test sample detected by PS-ESI MS with about 1 min signal duration for RMT443 and IS.

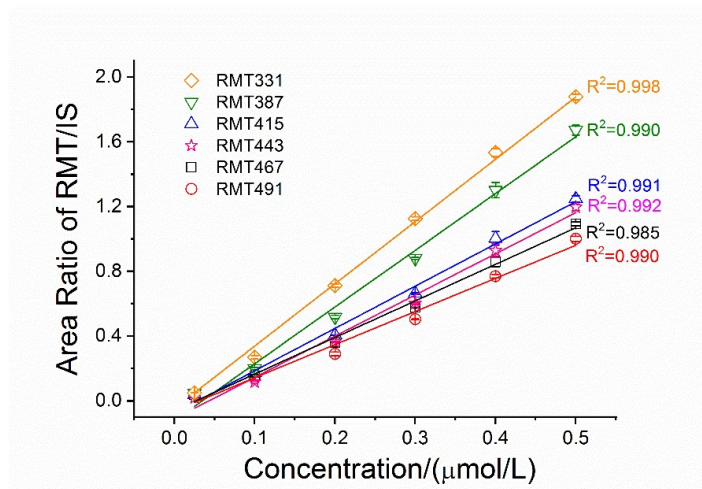

**Fig. S11** The calibration curves of the area ratios of six RMT reporters ( $m/z = 331.1, 387.2, 415.2, 443.2, 467.2$  and  $491.2$ ) and IS (crystal violet,  $m/z = 340.2$ ) in different RMT concentrations.

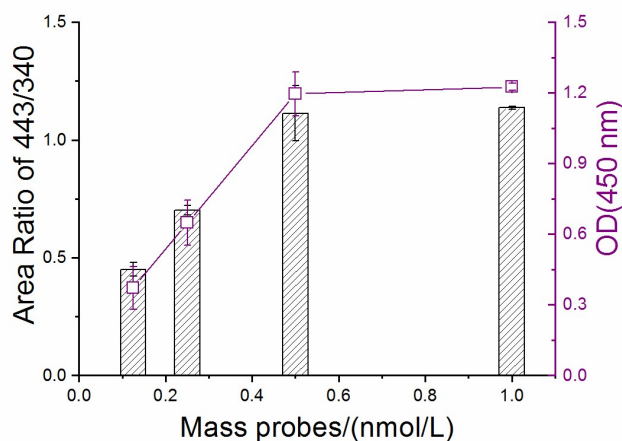

**Fig. S12** The optimization of the concentrations (from  $0.1 \text{ nmol/L}$  to  $1 \text{ nmol/L}$ ) of  $40 \mu\text{L}$  mass probes for the detection of IgG, the  $450 \text{ nm}$  values and MS signals of RMT443 fragment ( $m/z = 443.2$ ) and IS ( $m/z = 340.2$ ) for evaluation.

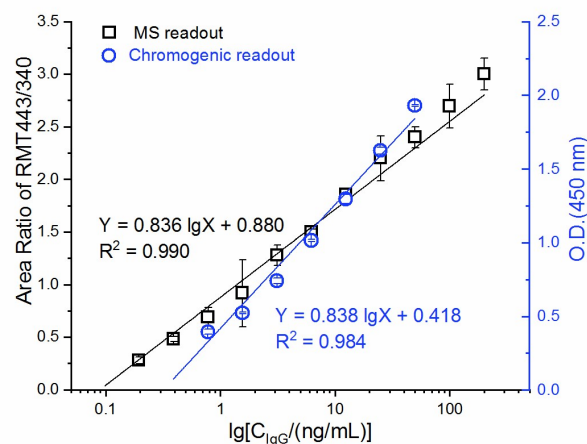

**Fig. S13** The calibration curves of MS signal area ratios (RMT443 and IS)/O.D. 450 nm values and logarithm of IgG concentrations in PBS.

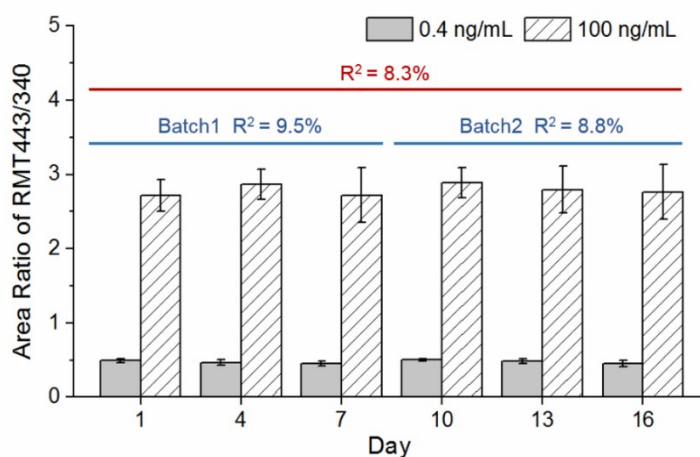

**Fig. S14** The robustness validation of the anti-IgG modified paper substrates and GNP@anti-IgG/RMT443 for the detection of IgG with low concentration of 0.4 ng/mL and high concentration of 100 ng/mL. One batch of paper substrates and mass probes were used for three tests on different days after their preparation, and two batches were tested, both showing good repeatability.

**Table S3** Calibration curves for CA15-3, CA19-9, CEA, CA125, HE4, and AFP simultaneous detection in PBS buffer by PS-ESI MS and their cut-off values in clinical diagnosis.

| Targets | RMTs   | Linear equation                                             | Linear ranges    | Limits of detection | Cut-off values |
|---------|--------|-------------------------------------------------------------|------------------|---------------------|----------------|
| CA15-3  | RMT331 | $Y = 0.0125 X(\text{U/mL}) + 0.236$<br>( $R^2 = 0.980$ )    | 1.6-100 U/mL     | 0.903 U/mL          | 25 U/mL        |
| CA19-9  | RMT387 | $Y = 0.00538 X(\text{U/mL}) + 0.229$<br>( $R^2 = 0.992$ )   | 1.6-100 U/mL     | 0.825 U/mL          | 40 U/mL        |
| CEA     | RMT415 | $Y = 0.0540 X(\text{ng/mL}) + 0.182$<br>( $R^2 = 0.990$ )   | 0.3-10 ng/mL     | 0.154 ng/mL         | 5 ng/mL        |
| CA125   | RMT443 | $Y = 0.00571 X(\text{U/mL}) + 0.153$<br>( $R^2 = 0.992$ )   | 3.1-100 U/mL     | 1.612 U/mL          | 35 U/mL        |
| HE4     | RMT467 | $Y = 1.33 X(\text{nmol/L}) + 0.219$<br>( $R^2 = 0.987$ )    | 0.016-0.5 nmol/L | 0.00830 nmol/L      | 140 pmol/L     |
| AFP     | RMT491 | $Y = 0.00172 X(\text{ng/mL}) + 0.0300$<br>( $R^2 = 0.998$ ) | 3.1-200 ng/mL    | 1.56 ng/mL          | 10 ng/mL       |

**Table S4** Standard addition measurements of CA15-3 with two concentrations and high concentrations of other five protein markers in serum.

|                      | <b>Added</b> | <b>Area ratio</b> | <b>Detected</b> | <b>Recovery%</b> | <b>RSD% (n=6-12)</b> |
|----------------------|--------------|-------------------|-----------------|------------------|----------------------|
| <b>CA15-3/(U/mL)</b> | <b>10</b>    | <b>0.363</b>      | <b>10.1</b>     | <b>101</b>       | <b>12</b>            |
|                      | <b>50</b>    | <b>0.850</b>      | <b>49.2</b>     | <b>98.3</b>      | <b>4.0</b>           |
| CA19-9/(U/mL)        | 100          | 0.722             | 91.6            | 91.6             | 4.3                  |
| CEA/(ng/mL)          | 10           | 0.781             | 11.1            | 111              | 7.1                  |
| CA125/(U/mL)         | 100          | 0.688             | 93.7            | 93.7             | 2.3                  |
| HE4/(pmol/L)         | 0.5          | 0.886             | 0.502           | 100              | 4.9                  |
| AFP/(ng/mL)          | 200          | 0.370             | 197             | 98.7             | 11                   |

**Table S5** Standard addition measurements of CA19-9 with two concentrations and high concentrations of other five protein markers in serum.

|                      | <b>Added</b> | <b>Area ratio</b> | <b>Detected</b> | <b>Recovery%</b> | <b>RSD% (n=6-12)</b> |
|----------------------|--------------|-------------------|-----------------|------------------|----------------------|
| CA15-3/(U/mL)        | 100          | 1.46              | 97.9            | 97.9             | 2.1                  |
| <b>CA19-9/(U/mL)</b> | <b>10</b>    | <b>0.279</b>      | <b>9.26</b>     | <b>92.6</b>      | <b>3.7</b>           |
|                      | <b>50</b>    | <b>0.465</b>      | <b>43.8</b>     | <b>87.7</b>      | <b>5.3</b>           |
| CEA/(ng/mL)          | 10           | 0.762             | 10.7            | 107              | 5.2                  |
| CA125/(U/mL)         | 100          | 0.669             | 90.3            | 90.3             | 3.5                  |
| HE4/(pmol/L)         | 0.5          | 0.892             | 0.506           | 101              | 4.0                  |
| AFP/(ng/mL)          | 200          | 0.386             | 207             | 104              | 6.9                  |

**Table S6** Standard addition measurements of CEA with two concentrations and high concentrations of other five protein markers in serum.

|                    | <b>Added</b> | <b>Area ratio</b> | <b>Detected</b> | <b>Recovery%</b> | <b>RSD% (n=6-12)</b> |
|--------------------|--------------|-------------------|-----------------|------------------|----------------------|
| CA15-3/(U/mL)      | 100          | 1.47              | 99.1            | 99.1             | 2.2                  |
| CA19-9/(U/mL)      | 100          | 0.704             | 88.4            | 88.4             | 5.4                  |
| <b>CEA/(ng/mL)</b> | <b>1</b>     | <b>0.237</b>      | <b>1.02</b>     | <b>102</b>       | <b>13</b>            |
|                    | <b>5</b>     | <b>0.465</b>      | <b>5.25</b>     | <b>105</b>       | <b>5.5</b>           |
| CA125/(U/mL)       | 100          | 0.679             | 92.2            | 92.2             | 4.6                  |
| HE4/(pmol/L)       | 0.5          | 0.877             | 0.495           | 99.0             | 1.2                  |
| AFP/(ng/mL)        | 200          | 0.371             | 198             | 99.2             | 4.2                  |

**Table S7** Standard addition measurements of CA125 with two concentrations and high concentrations of other five protein markers in serum.

|                     | Added     | Area ratio   | Detected    | Recovery%   | RSD% (n=6-12) |
|---------------------|-----------|--------------|-------------|-------------|---------------|
| CA15-3/(U/mL)       | 100       | 1.47         | 98.5        | 98.5        | 2.9           |
| CA19-9/(U/mL)       | 100       | 0.702        | 88.0        | 88.0        | 4.5           |
| CEA/(ng/mL)         | 10        | 0.751        | 10.5        | 105         | 3.2           |
| <b>CA125/(U/mL)</b> | <b>10</b> | <b>0.217</b> | <b>11.3</b> | <b>113</b>  | <b>7.5</b>    |
|                     | <b>50</b> | <b>0.405</b> | <b>44.1</b> | <b>88.2</b> | <b>3.2</b>    |
| HE4/(pmol/L)        | 0.5       | 0.891        | 0.505       | 101         | 1.5           |
| AFP/(ng/mL)         | 200       | 0.371        | 199         | 99.3        | 7.3           |

**Table S8** Standard addition measurements of HE4 with two concentrations and high concentrations of other five protein markers in serum.

|                     | Added       | Area ratio   | Detected      | Recovery%  | RSD% (n=6-12) |
|---------------------|-------------|--------------|---------------|------------|---------------|
| CA15-3/(U/mL)       | 100         | 1.48         | 99.5          | 99.5       | 4.1           |
| CA19-9/(U/mL)       | 100         | 0.715        | 90.2          | 90.2       | 2.2           |
| CEA/(ng/mL)         | 10          | 0.772        | 10.9          | 109        | 6.1           |
| CA125/(U/mL)        | 100         | 0.671        | 90.7          | 90.7       | 6.1           |
| <b>HE4/(pmol/L)</b> | <b>0.05</b> | <b>0.293</b> | <b>0.0556</b> | <b>111</b> | <b>4.1</b>    |
|                     | <b>0.25</b> | <b>0.560</b> | <b>0.257</b>  | <b>103</b> | <b>8.9</b>    |
| AFP/(ng/mL)         | 200         | 0.364        | 194           | 97.2       | 3.9           |

**Table S9** Standard addition measurements of AFP with two concentrations and high concentrations of other five protein markers in serum.

|                    | Added      | Area ratio    | Detected    | Recovery%  | RSD% (n=6-12) |
|--------------------|------------|---------------|-------------|------------|---------------|
| CA15-3/(U/mL)      | 100        | 1.49          | 100.0       | 100        | 3.5           |
| CA19-9/(U/mL)      | 100        | 0.724         | 91.9        | 91.9       | 2.7           |
| CEA/(ng/mL)        | 10         | 0.754         | 10.6        | 106        | 7.0           |
| CA125/(U/mL)       | 100        | 0.696         | 95.1        | 95.1       | 8.9           |
| HE4/(pmol/L)       | 0.5        | 0.884         | 0.500       | 100        | 5.2           |
| <b>AFP/(ng/mL)</b> | <b>20</b>  | <b>0.0693</b> | <b>22.9</b> | <b>114</b> | <b>3.7</b>    |
|                    | <b>100</b> | <b>0.204</b>  | <b>101</b>  | <b>101</b> | <b>1.0</b>    |



**Table S10** Performances of existing multiplexed immunoassays with simultaneous read-out techniques for cancer biomarker detection in serum.

| Methods    | Biomarkers                               | Labeling materials                             | Sample needed | Time*       | Linear ranges                                                                    | Limits of detection                                  | Ref |
|------------|------------------------------------------|------------------------------------------------|---------------|-------------|----------------------------------------------------------------------------------|------------------------------------------------------|-----|
| ELISA      | CEA<br>Cyfra21-1<br>NSE                  | MGCB-Ab2-<br>cGO                               | 100 $\mu$ L   | >120<br>min | 20 pg/mL-10 ng/mL<br>1 pg/mL-10 ng/mL<br>0.1 pg/mL-10 ng/mL<br>(IgG)             | 20 pg/mL<br>1 pg/mL<br>0.1 pg/mL                     | S1  |
| FIA (FRET) | NSE<br>SCC<br>CEA<br>Cyfra21-1<br>CA15-3 | Dye-Ab                                         | 50 $\mu$ L    | ~45 min     | -                                                                                | ~ ng/mL                                              | S2  |
| FIA        | CEA<br>PSA<br>AFP<br>VEGF                | Dye-Ab<br>ribonuclease H                       | 5 $\mu$ L     | >60 min     | 5 pg/mL-500 ng/mL<br>2 pg/mL-200 ng/mL<br>1 pg/mL-100 ng/mL<br>4 pg/mL-400 ng/mL | 2.94 pg/mL<br>1.25 pg/mL<br>0.65 pg/mL<br>2.26 pg/mL | S3  |
| SERS-IA    | cTnl<br>NT-ProBNP<br>NGAL                | Raman<br>reporter-<br>nanostars-Ab             | 20 $\mu$ L    | >80 min     | 1 fg/mL-1 $\mu$ g/mL                                                             | 0.76 fg/mL<br>0.53 fg/mL<br>0.41 fg/mL               | S4  |
| ECLIA      | CEA<br>AFP<br>$\beta$ -HCG               | Ruthenium(II)/<br>iridium(III)<br>complexes-Ab | 300 $\mu$ L   | >180<br>min | -                                                                                | 5 ng/mL<br>25 ng/mL<br>5 mIU/mL                      | S5  |
| ECLIA      | CEA<br>AFP                               | CdTe-Ab<br>CdSe-Ab                             | 20 $\mu$ L    | >150<br>min | 1 pg/mL-10 ng/mL<br>10 fg/mL-100 pg/mL                                           | 1 pg/mL<br>10 fg/mL                                  | S6  |
| ICP-MS IA  | CEA<br>AFP<br>FER                        | Ho/Eu/Pr-<br>DNA-<br>Ab                        | 50 $\mu$ L    | >180<br>min | ~0-100 pg/mL                                                                     | 3.31 pg/mL<br>5.31 pg/mL<br>2.02 pg/mL               | S7  |

| Methods    | Biomarkers                                     | Labeling materials       | Sample needed | Time*    | Linear ranges                                                                                     | Limits of detection                                                                   | Ref |
|------------|------------------------------------------------|--------------------------|---------------|----------|---------------------------------------------------------------------------------------------------|---------------------------------------------------------------------------------------|-----|
| spICPMS IA | CA125<br>CEA<br>CA199                          | AuNPs/AgNPs<br>/PtNPs-Ab | 10 $\mu$ L    | >120 min | 2-200 U/mL<br>2-500 ng/mL<br>1-500 U/mL                                                           | 0.43 U/mL<br>0.90 ng/mL<br>0.80 U/mL                                                  | S8  |
| LDI-MS IA  | lactoferrin<br>BSA                             | PEG-GNPs-Ab              | 3–30 nL       | >60 min  | -                                                                                                 | 18 pg/mL<br>54 pg/mL                                                                  | S9  |
| PSI-MS IA  | malaria<br>PfHRP2<br>CA125<br>CEA              | ITEA/ITBA-Ab             | 20 $\mu$ L    | >60 min  | 0.05-10 nmol/L                                                                                    | 2.8 ng/mL<br>250 U/mL<br>100 ng/mL                                                    | S10 |
| This work  | CA15-3<br>CA19-9<br>CEA<br>CA125<br>HE4<br>AFP | RMTs/Ab-<br>GNPs         | 10 $\mu$ L    | <60 min  | 1.6-100 U/mL<br>1.6-100 U/mL<br>0.3-10 ng/mL<br>3.1-100 U/mL<br>0.016-0.5 nmol/L<br>3.1-200 ng/mL | 0.903 U/mL<br>0.825 U/mL<br>0.154 ng/mL<br>1.612 U/mL<br>0.00830 nmol/L<br>1.56 ng/mL |     |

\*Time was calculated from the addition of serum sample to the read-out of the results for one test.

ELISA: Enzyme-linked immunosorbent assay; FIA: Fluorescence immunoassay; FRET: Förster resonance energy transfer; SERS-IA: Surface enhanced raman scattering immunoassay; ECLIA: Electrochemiluminescence immunoassay; ICP-MS IA: Inductively coupled plasma mass spectrometry immunoassay; spICPMS IA: Single-particle inductively coupled plasma mass spectrometry immunoassay; LDI-MS IA: Laser desorption ionization mass spectrometry immunoassay; PSI-MS IA: Paper spray ionization mass spectrometry immunoassay.

**Table S11** Detection results of six cancer biomarkers in 12 patient serum sample by PS-ESI MS-based immunoassays and the clinical ECLIA.

|           | CA153/(U/mL) |                      | CA199/(U/mL) |                      | CA125/(U/mL) |                      | CEA/(ng/mL)  |                      | AFP/(ng/mL)  |                      |
|-----------|--------------|----------------------|--------------|----------------------|--------------|----------------------|--------------|----------------------|--------------|----------------------|
|           | ECLIA        | PS-ESI MS<br>(n = 6) |
| <b>L1</b> | 10.8         | 10.6±0.31            | 42.1         | 43.3±0.91            | 10.4         | 11.4±0.33            | 3.45         | 3.68±0.13            | 13.9         | 12.8±0.45            |
| <b>L2</b> | 7.64         | 7.92±0.56            | 4.55         | 4.28±0.22            | 13.9         | 12.1±0.54            | 0.640        | 0.611±0.016          | 130          | 128±2.8              |
| <b>L3</b> | <i>N</i>     | 13.2±0.59            | 10.6         | 12.8±0.51            | 7.23         | 7.88±0.25            | 3.06         | 3.20±0.13            | 88.9         | 88.4±3.6             |
| <b>B1</b> | 11.1         | 12.0±0.35            | 18.9         | 19.3±0.83            | 24.5         | 25.7±0.56            | 0.930        | 1.04±0.073           | 1.60         | <i>n</i>             |
| <b>B2</b> | 9.37         | 9.20±0.20            | 23.2         | 23.4±1.6             | 16.2         | 17.0±1.0             | 1.80         | 1.30±0.12            | 1.88         | <i>n</i>             |
| <b>B3</b> | 10.8         | 10.8±0.58            | 22.9         | 22.5±1.1             | 29.9         | 29.4±1.8             | 1.27         | 1.17±0.061           | 1.97         | <i>n</i>             |
| <b>B4</b> | 5.77         | 5.20±0.18            | 10.8         | 11.1±0.44            | 10.4         | 11.7±0.85            | 0.720        | 0.722±0.030          | 3.18         | 3.49±0.31            |
| <b>B5</b> | 7.26         | 7.12±0.11            | 9.10         | 9.48±0.65            | 7.44         | 6.83±0.28            | 0.610        | 0.667±0.023          | 1.51         | <i>n</i>             |
| <b>B6</b> | 13.3         | 14.0±1.8             | 0.610        | <i>n</i>             | 14.2         | 15.4±1.4             | 2.15         | 2.22±0.083           | 3.15         | 4.07±0.36            |
| <b>G1</b> | 6.77         | 7.04±0.32            | 5.09         | 5.58±0.13            | 12.9         | 13.5±0.53            | 8.81         | 9.13±0.091           | 4.22         | 4.65±0.24            |
| <b>G2</b> | 7.31         | 7.20±0.33            | 17.0         | 16.8±0.62            | 10.4         | 10.2±0.22            | 1.54         | 1.46±0.057           | 5.74         | 5.81±0.52            |
| <b>G3</b> | 12.4         | 13.0±0.55            | 7.83         | 7.43±0.39            | 10.2         | 10.3±0.40            | 1.84         | 1.96±0.053           | 6.56         | 6.40±0.26            |
| <b>R</b>  | <b>0.993</b> |                      | <b>0.998</b> |                      | <b>0.990</b> |                      | <b>0.997</b> |                      | <b>0.999</b> |                      |

N: Not detected in clinic by ECLIA; n: Out of detection range by PS-ESI MS-based immunoassays; R: Correlation coefficient for the detection results from two different methods.

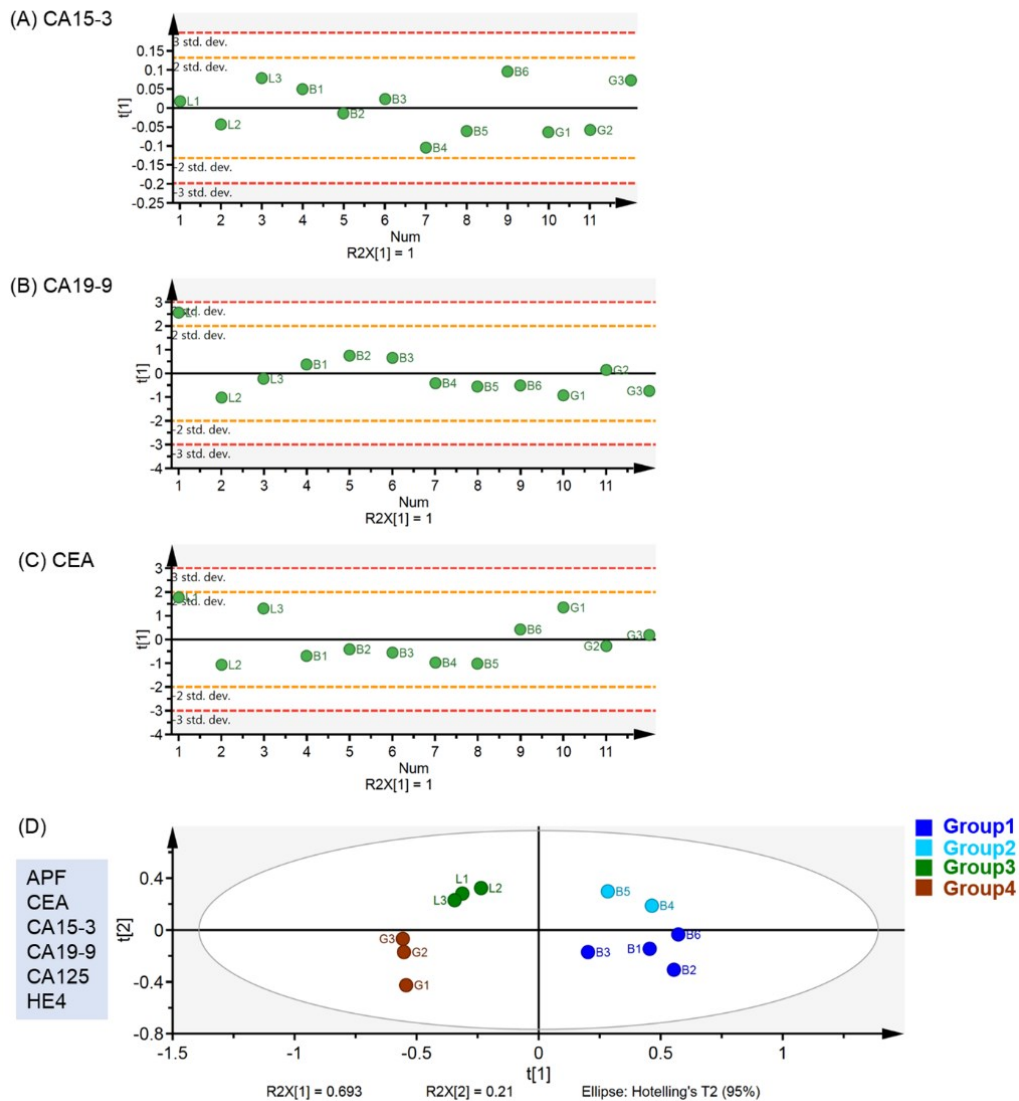

**Fig. S15** Principal component analysis (PCA) results (one component) with only one detected calibrated RMT peak areas of biomarkers: (A) RMT331 (CA15-3, known as specific for breast cancer), (B) RMT387 (CA19-9, known as specific for pancreatic cancer), (C) RMT415 (CEA, known as candidate for colorectal cancer, lung cancer, pancreatic cancer, gastric cancer and so on). (D) PCA result of 12 patient serum samples based on the calibrated RMT peak areas of six biomarkers: RMT491 (APF), RMT415 (CEA), RMT331 (CA15-3), RMT387 (CA19-9), RMT443 (CA125) and RMT467 (HE4). Labels of the scatters representing the different tumor series: breast (B1-6), liver (L1-3), and gastric (G1-3), and scatters marked in different four colors based on the results of hierarchical clustering (Ward's method, square Euclidean distance) to four groups. There was the potential for combining six biomarkers to distinguish different sites and even the benign and malignant breast tumors.

## References:

- S1. C. Li, Y. Yang, D. Wu, T. Li, Y. Yin and G. Li, *Chem. Sci.*, 2016, 7, 3011-3016.
- S2. D. Geissler, S. Stufler, H.-G. Loehmannsroebe and N. Hildebrandt, *J. Am. Chem. Soc.*, 2013, 135, 1102-1109.
- S3. J. Xu, M. Shi, W. Chen, Y. Huang, L. Fang, L. Yao, S. Zhao, Z.-F. Chen and H. Liang, *Chem. Commun.*, 2018, 54, 2719-2722.
- S4. Y. Su, S. Xu, J. Zhang, X. Chen, L.-P. Jiang, T. Zheng and J.-J. Zhu, *Anal. Chem.*, 2019, 91, 864-872.
- S5. W. Guo, H. Ding, C. Gu, Y. Liu, X. Jiang, B. Su and Y. Shao, *J. Am. Chem. Soc.*, 2018, 140, 15904-15915.
- S6. G. Zou, X. Tan, X. Long, Y. He and W. Miao, *Anal. Chem.*, 2017, 89, 13024-13029.
- S7. Z. Hu, G. Sun, W. Jiang, F. Xu, Y. Zhang, M. Xia, X. Pan, Z. Xing, S. Zhang and X. Zhang, *Anal. Chem.*, 2019, 91, 5980-5986.
- S8. Z. Huang, Z. Li, M. Jiang, R. Liu and Y. Lv, *Anal. Chem.*, 2020, 92, 16105-16112.
- S9. X. Zhong, L. Qiao, N. Gasilova, B. Liu and H. H. Girault, *Anal. Chem.*, 2016, 88, 6184-6189.
- S10. S. Chen, Q. Wan and A. K. Badu-Tawiah, *J. Am. Chem. Soc.*, 2016, 138, 6356-6359.
